# Supplementary material for: Harnessing Metabolites as Serum Biomarkers for Liver Graft Pathology Prediction Using Machine Learning
Source: MDPI journal article supplement (doi:10.3390/metabo14050254), 2024-04-27
Supplement: s1 [file s1]

**A**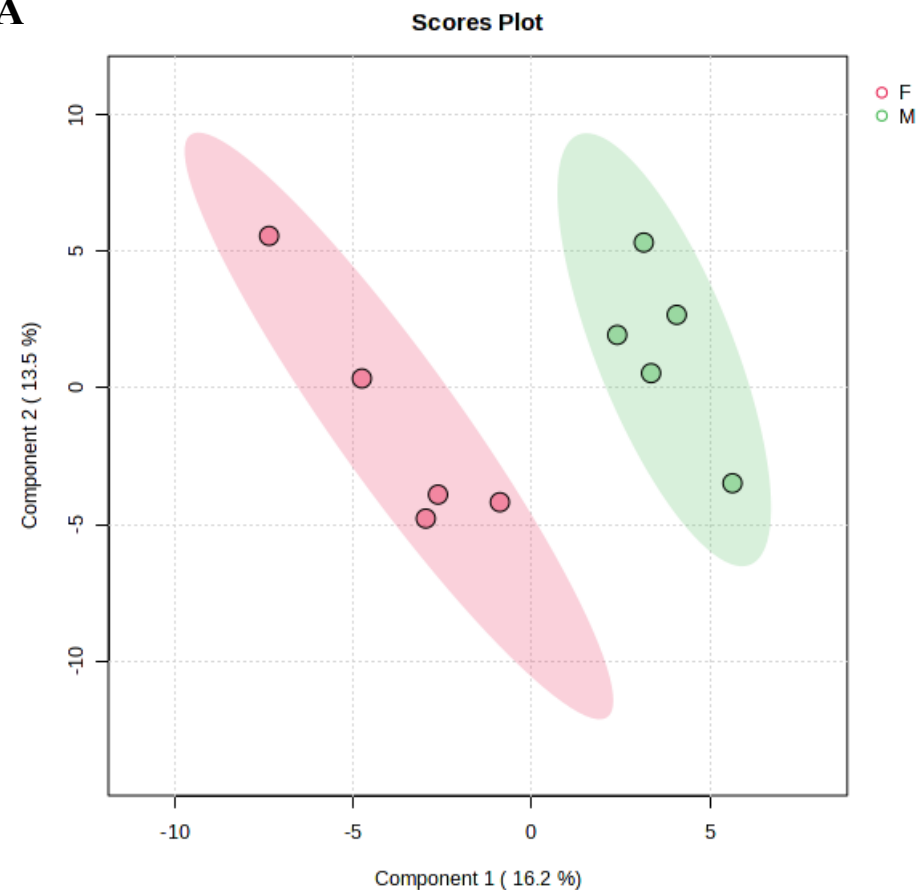**B**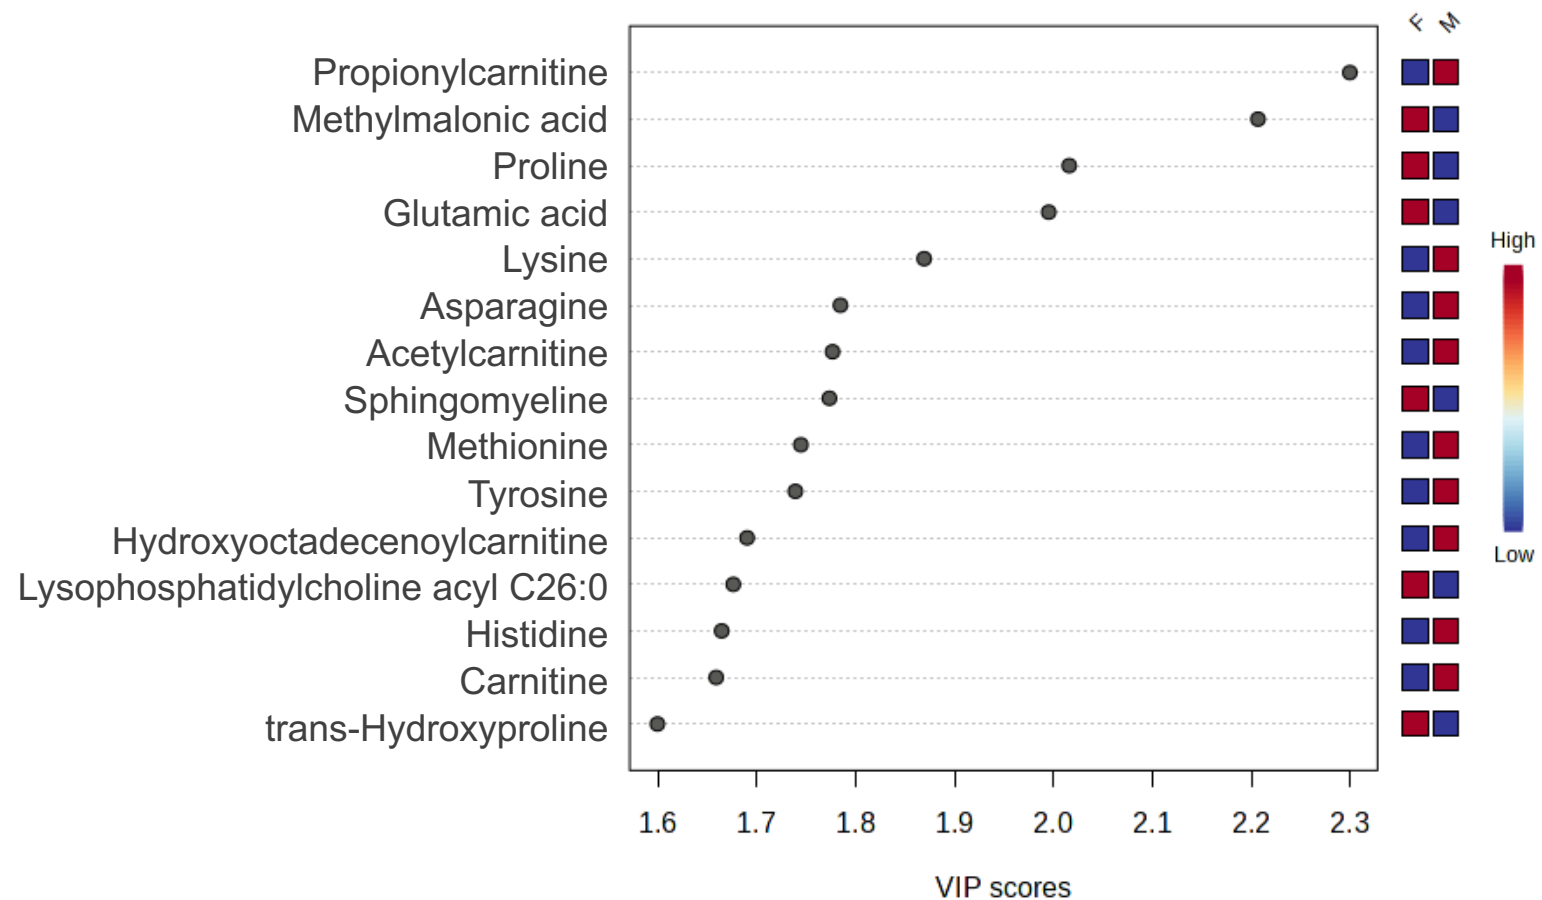

**Figure S2.** MASH group – PLS-DA sex-based analysis. **A.** scores plot between the first 2 components and **B** important features identified by PLS-DA.
