# Supplementary material for: Harnessing Metabolites as Serum Biomarkers for Liver Graft Pathology Prediction Using Machine Learning
Source: MDPI journal article supplement (doi:10.3390/metabo14050254), 2024-04-27
Supplement: s1 [file s1]

**A****Scores Plot**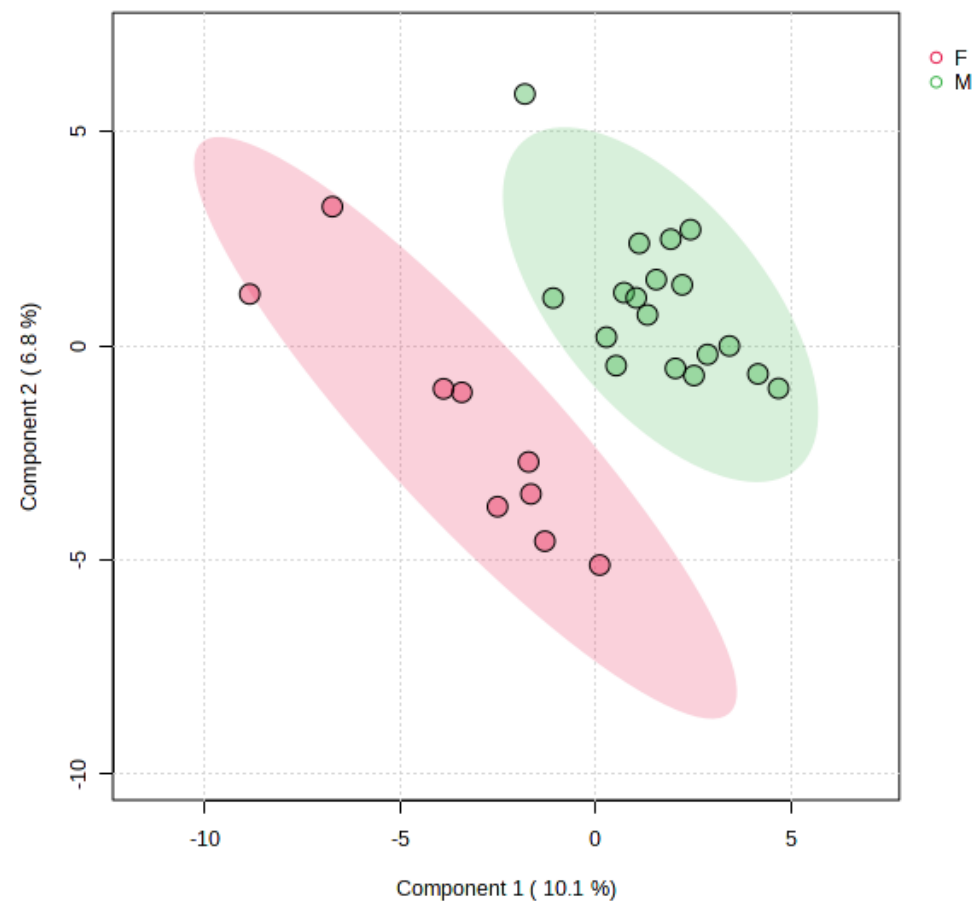**B**

Butyrylcarnitine  
 Malonylcarnitine  
 Hexenoylcarnitine  
 Propionic acid  
 Lysophosphatidylcholine acyl C17:0  
 Tiglylcarnitine  
 Diacetylspermine  
 Serine  
 Hydroxyoctadecenoylcarnitine  
 Hydroxytetradecenoylcarnitine  
 Octadecadienylcarnitine  
 Hippuric acid  
 Methylglutaryl carnitine  
 p-Hydroxyhippuric acid  
 Serotonin

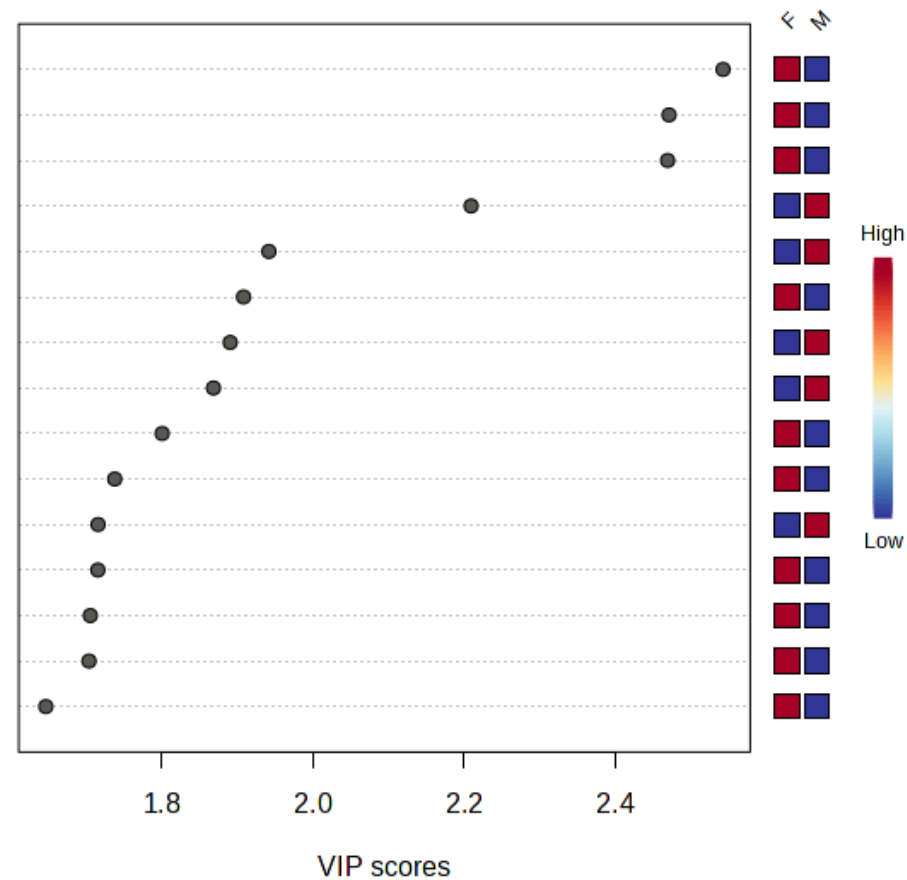

**Figure S4.** Biliary group – PLS-DA sex-based analysis. **A.** scores plot between the first 2 components and **B** important features identified by PLS-DA.
