# Supplementary material for: Harnessing Metabolites as Serum Biomarkers for Liver Graft Pathology Prediction Using Machine Learning
Source: Metabolites. 2024 Apr 27;14(5):254. doi: 10.3390/metabo14050254 (PMC11122840; doi:10.3390/metabo14050254)
Supplement: Supplementary file 1 [file metabolites-14-00254-s001.zip › Table S1.xlsx]

## Sheet: MASH_vs_TCMR
Metabolite	Comp. 1	Comp. 2	Comp. 3	Comp. 4	Comp. 5	Comp. 6	Comp. 7	Comp. 8
Serine	3.0877	2.6681	2.6074	2.5558	2.541	2.5344	2.5318	2.5308
Phenylalanine	2.7332	2.3744	2.3226	2.2782	2.2668	2.2669	2.2645	2.2637
alpha-Aminoadipic acid	2.0817	1.8397	1.811	1.7809	1.7708	1.7694	1.7677	1.7672
Hydroxysphingomyeline C22:1	2.0204	1.7686	1.7268	1.6962	1.6877	1.6837	1.6829	1.6828
Nonaylcarnitine	1.9787	1.7045	1.6647	1.6535	1.6441	1.6398	1.6391	1.6385
Decanoylcarnitine	1.9704	1.8127	1.7753	1.7417	1.7316	1.7271	1.7252	1.7246
Betaine	1.9177	1.6737	1.6366	1.6033	1.5945	1.5914	1.5914	1.5909
Succinic acid	1.7745	1.5315	1.5091	1.4792	1.4773	1.4739	1.4736	1.4731
Octanoylcarnitine	1.6543	1.5361	1.5201	1.4888	1.4819	1.4782	1.4767	1.4761
Lysophosphatidylcholine acyl C18:1	1.6118	1.4541	1.4263	1.4264	1.4181	1.4145	1.4129	1.4123
Lysophosphatidylcholine acyl C26:1	1.604	1.3947	1.3778	1.3496	1.3423	1.3393	1.3379	1.3375
Dodecanoylcarnitine	1.5856	1.482	1.4482	1.4622	1.4537	1.45	1.4486	1.4482
Hydroxyhexadecanoylcarnitine	1.5715	1.3817	1.356	1.3326	1.3285	1.3257	1.3267	1.3264
Citric acid	1.5668	1.3778	1.3677	1.3441	1.3366	1.3332	1.3319	1.3317
Citrulline	1.549	1.5205	1.5213	1.4899	1.485	1.4823	1.4809	1.4808
Valine	1.5426	1.3505	1.3184	1.3223	1.3194	1.3335	1.3322	1.3317
Hexadecenoylcarnitine	1.5336	1.5077	1.5154	1.4879	1.4795	1.4757	1.4744	1.4743
Methylglutarylcarnitine	1.4848	1.3027	1.273	1.2752	1.2718	1.2685	1.2684	1.2687
Phosphatidylcholine diacyl C40:6	1.4671	1.5132	1.4947	1.4771	1.4704	1.4703	1.4687	1.4696
alpha-Ketoglutaric acid	1.4601	1.3197	1.2883	1.2625	1.2607	1.2609	1.2597	1.2594
Asparagine	1.4482	1.2945	1.2674	1.2426	1.2357	1.2341	1.2353	1.2355
Phosphatidylcholine acyl-alkyl C36:0	1.4392	1.2385	1.2298	1.2467	1.2416	1.2388	1.2391	1.2405
Spermine	1.4209	1.2822	1.2534	1.2438	1.2398	1.2373	1.2368	1.2372
Methylhistidine	1.4026	1.2157	1.1934	1.1775	1.1831	1.1821	1.1822	1.1817
Lysophosphatidylcholine acyl C16:1	1.3796	1.4067	1.3918	1.363	1.3567	1.3541	1.3526	1.3522
Kynurenine	1.3789	1.2266	1.215	1.1944	1.1879	1.1927	1.1915	1.1912
Hydroxyhexadecadienoylcarnitine	1.3774	1.1888	1.1606	1.1729	1.1671	1.1681	1.1669	1.1666
Dodecenoylcarnitine 12:1	1.3059	1.2712	1.241	1.2629	1.2635	1.2605	1.2597	1.2593
Carnitine	1.2752	1.3553	1.3439	1.3194	1.3214	1.3189	1.3175	1.317
Creatinine	1.2644	1.1101	1.0951	1.1018	1.0972	1.099	1.0979	1.0978
Serotonin	1.2588	1.2207	1.207	1.1938	1.1881	1.1879	1.1882	1.1878
Phosphatidylcholine diacyl C40:1	1.2528	1.2574	1.2285	1.275	1.268	1.2681	1.2677	1.2677
Fumaric acid	1.2485	1.0934	1.0874	1.0661	1.0606	1.0601	1.0599	1.0594
Octadecadienylcarnitine	1.2251	1.0692	1.0485	1.027	1.0264	1.0239	1.0235	1.0233
Decenoylcarnitine	1.2041	1.2955	1.2662	1.2431	1.2421	1.2442	1.2429	1.2425
Uric acid	1.1835	1.0706	1.0859	1.0652	1.0593	1.0574	1.0587	1.0599
Phosphatidylcholine acyl-alkyl C40:0	1.1338	1.0533	1.0429	1.0773	1.0711	1.0684	1.0677	1.0678
Lysophosphatidylcholine acyl C18:0	1.082	1.4527	1.4207	1.423	1.4163	1.4126	1.4113	1.4107
Trimethylamine N-oxide	1.0532	1.0682	1.1162	1.0935	1.0937	1.0916	1.0905	1.091
