# Supplementary material for: Harnessing Metabolites as Serum Biomarkers for Liver Graft Pathology Prediction Using Machine Learning
Source: Metabolites. 2024 Apr 27;14(5):254. doi: 10.3390/metabo14050254 (PMC11122840; doi:10.3390/metabo14050254)
Supplement: Supplementary file 1 [file metabolites-14-00254-s001.zip › Table S2.xlsx]

## Sheet: MASH_vs_Biliary
Metabolite	Comp. 1	Comp. 2	Comp. 3	Comp. 4	Comp. 5	Comp. 6	Comp. 7	Comp. 8
Hydroxysphingomyeline C22:1	2.9272	2.416	2.232	2.1854	2.1524	2.1376	2.1326	2.1307
Phenylalanine	2.2979	1.9531	1.7874	1.7344	1.7162	1.7041	1.7003	1.6991
Succinic acid	2.1257	1.7122	1.5945	1.5795	1.5593	1.5496	1.5461	1.5451
Lysophosphatidylcholine acyl C18:0	2.0601	1.6619	1.601	1.5564	1.5449	1.5388	1.536	1.5349
Serine	1.8663	1.701	1.5627	1.517	1.5007	1.4914	1.4937	1.4926
Phosphatidylcholine diacyl C40:6	1.8417	1.8243	1.7022	1.6518	1.6309	1.6198	1.6206	1.6195
Phosphatidylcholine acyl-alkyl C36:0	1.7595	1.5631	1.4544	1.435	1.4139	1.4044	1.4021	1.4019
Lysophosphatidylcholine acyl C14:0	1.6917	1.4112	1.3848	1.3577	1.3518	1.3479	1.3448	1.3436
Hydroxyhexadecadienoylcarnitine	1.6866	1.452	1.3935	1.3892	1.3703	1.3606	1.362	1.3626
Acetylcarnitine	1.6833	1.4175	1.298	1.3127	1.3136	1.3058	1.3038	1.3027
Alanine	1.648	1.3146	1.2587	1.2271	1.2117	1.2036	1.2008	1.2013
Citric acid	1.6419	1.308	1.3646	1.3341	1.3153	1.3074	1.3054	1.3043
Phosphatidylcholine diacyl C40:2	1.5799	1.5415	1.4131	1.374	1.3621	1.3529	1.3497	1.3486
Kynurenine	1.5542	1.2878	1.1844	1.1495	1.1401	1.1537	1.1537	1.1536
Betaine	1.5465	1.2356	1.1348	1.1025	1.0859	1.0894	1.0898	1.0906
Methylglutarylcarnitine	1.4954	1.1965	1.1511	1.1881	1.1789	1.1752	1.1728	1.1729
Methionine-sulfoxide	1.4786	1.178	1.0806	1.0576	1.0446	1.0632	1.0608	1.06
Putrescine	1.4755	1.1759	1.1412	1.1157	1.1057	1.0982	1.0977	1.0985
beta-Hydroxybutyric acid	1.4654	1.175	1.0864	1.0559	1.0453	1.0601	1.059	1.0582
Sphingomyeline C16:0	1.4501	1.4343	1.3129	1.295	1.2852	1.2766	1.2737	1.2729
Asparagine	1.4078	1.2568	1.1499	1.1612	1.1437	1.151	1.1506	1.1499
Valine	1.4041	1.2871	1.1819	1.1531	1.1361	1.1333	1.1306	1.1306
Leucine	1.3413	1.1905	1.0885	1.0788	1.0678	1.0665	1.0641	1.0632
Glycine	1.3367	1.1778	1.0783	1.1223	1.1072	1.1057	1.1034	1.1033
Phosphatidylcholine diacyl C40:1	1.3087	1.3897	1.2825	1.2447	1.2413	1.2332	1.2303	1.2296
Sphingomyeline C16:1	1.3017	1.3378	1.2232	1.2449	1.2264	1.2178	1.2152	1.2155
Aspartic acid	1.2655	1.0222	1.0736	1.0437	1.0302	1.0255	1.0237	1.0255
Sphingomyeline C20:2	1.2624	1.197	1.0974	1.1068	1.0955	1.0938	1.0959	1.095
Hydroxysphingomyeline C16:1	1.2588	1.0894	1.1072	1.077	1.062	1.0548	1.0613	1.0604
Tryptophan	1.2561	1.3549	1.3168	1.2861	1.2667	1.2578	1.2549	1.2549
Isoleucine	1.2514	1.2103	1.1083	1.1106	1.0974	1.0896	1.0878	1.0872
Decanoylcarnitine	1.2358	1.2792	1.2176	1.2271	1.2279	1.2193	1.2278	1.2267
Octanoylcarnitine	1.1919	1.365	1.2522	1.2305	1.2765	1.2676	1.2647	1.2647
Lysophosphatidylcholine acyl C18:1	1.1784	1.1813	1.4124	1.3721	1.3622	1.3541	1.3526	1.3514
Dodecanoylcarnitine	1.1543	1.4164	1.3736	1.3382	1.323	1.3137	1.3122	1.3119
Acetyl-ornithine	1.0892	1.3071	1.2311	1.2303	1.2133	1.2106	1.2082	1.2091
Sphingomyeline C18:0	1.0499	1.2558	1.153	1.1276	1.114	1.1143	1.1121	1.1112
Pimeloylcarnitine	1.0303	1.0176	1.0272	1.0558	1.0741	1.0793	1.0777	1.0787
