# Supplementary material for: Harnessing Metabolites as Serum Biomarkers for Liver Graft Pathology Prediction Using Machine Learning
Source: Metabolites. 2024 Apr 27;14(5):254. doi: 10.3390/metabo14050254 (PMC11122840; doi:10.3390/metabo14050254)
Supplement: Supplementary file 1 [file metabolites-14-00254-s001.zip › Table S3.xlsx]

## Sheet: Biliary_vs_TCMR
Metabolite	Comp. 1	Comp. 2	Comp. 3	Comp. 4	Comp. 5	Comp. 6	Comp. 7	Comp. 8
Serotonin	2.7587	2.2923	2.0411	1.9948	1.957	1.9339	1.9243	1.9195
Spermine	2.3651	1.7434	1.572	1.5336	1.5011	1.4926	1.4956	1.493
Acetylcarnitine	2.157	1.5698	1.4508	1.4611	1.4294	1.4208	1.4211	1.419
Lysophosphatidylcholine acyl C24:0	1.9547	1.4007	1.2709	1.2917	1.2829	1.2956	1.2892	1.2862
Lysophosphatidylcholine acyl C26:1	1.9173	1.3869	1.3024	1.2707	1.3066	1.3075	1.3252	1.322
Hydroxyhexadecanoylcarnitine	1.8239	1.3021	1.175	1.16	1.1769	1.1648	1.175	1.1726
Alanine	1.7416	1.2555	1.1741	1.1723	1.1532	1.1467	1.1434	1.1407
Pimeloylcarnitine	1.6738	1.5538	1.3823	1.3487	1.3259	1.3119	1.3099	1.3067
Sarcosine	1.6686	1.1916	1.0653	1.0429	1.1806	1.1724	1.1664	1.1636
Nonaylcarnitine	1.5695	1.1595	1.2957	1.2738	1.2474	1.2493	1.2431	1.2473
Citrulline	1.5625	1.1211	1.052	1.0369	1.0188	1.0241	1.0227	1.0212
Phosphatidylcholine diacyl C40:2	1.5404	1.2788	1.2385	1.2113	1.2245	1.21	1.2057	1.2035
Hydroxysphingomyeline C22:1	1.5383	1.1499	1.2436	1.217	1.191	1.1834	1.1775	1.1755
Sphingomyeline C16:1	1.5102	1.2537	1.1572	1.1637	1.1391	1.127	1.1212	1.1186
Isobutyric acid	1.4745	1.9018	1.7695	1.7262	1.6896	1.6756	1.6712	1.6671
Dodecenoylcarnitine	1.4707	1.5134	1.3858	1.3552	1.3336	1.3181	1.3182	1.3161
Butyric acid	1.4395	1.2967	1.2541	1.3154	1.2891	1.2743	1.2754	1.2804
Aspartic acid	1.4284	1.3012	1.1608	1.1324	1.1144	1.1029	1.1181	1.1178
Trimethylamine N-oxide	1.3613	1.1639	1.0406	1.0221	1.0555	1.0553	1.0501	1.048
Lysophosphatidylcholine acyl C18:0	1.3339	1.3386	1.2344	1.2049	1.2189	1.2099	1.2038	1.2009
alpha-Ketoglutaric acid	1.2879	1.0996	1.0364	1.0436	1.0267	1.0147	1.0168	1.0174
Sphingomyeline C18:0	1.2267	1.2335	1.1329	1.1253	1.103	1.1163	1.1127	1.1101
Lysophosphatidylcholine acyl C14:0	1.1693	1.4391	1.2869	1.2641	1.2515	1.2473	1.2409	1.2379
Decadienoylcarnitine	1.1595	1.4337	1.2872	1.2777	1.2501	1.2369	1.2547	1.2517
Sphingomyeline C16:0	1.1395	1.1131	1.0001	1.0526	1.0538	1.0462	1.0413	1.0434
Taurine	1.1137	1.3383	1.4423	1.4255	1.4035	1.3902	1.3898	1.3877
Glutaconylcarnitine	1.0816	1.0122	1.0414	1.0916	1.078	1.0679	1.065	1.0656
Lysophosphatidylcholine acyl C17:0	1.0272	1.052	1.0247	1.0227	1.0071	1.0288	1.0238	1.0213
